# Supplementary material
Source: PubMed Central journal article supplement (PMC4577399)
Supplement: supp_pp.15.00587_00587revsupp.pdf [file supp_pp.15.00587_00587revsupp.pdf]

## SUPPLEMENTAL FIGURE LEGENDS

## Supplemental Figure S1

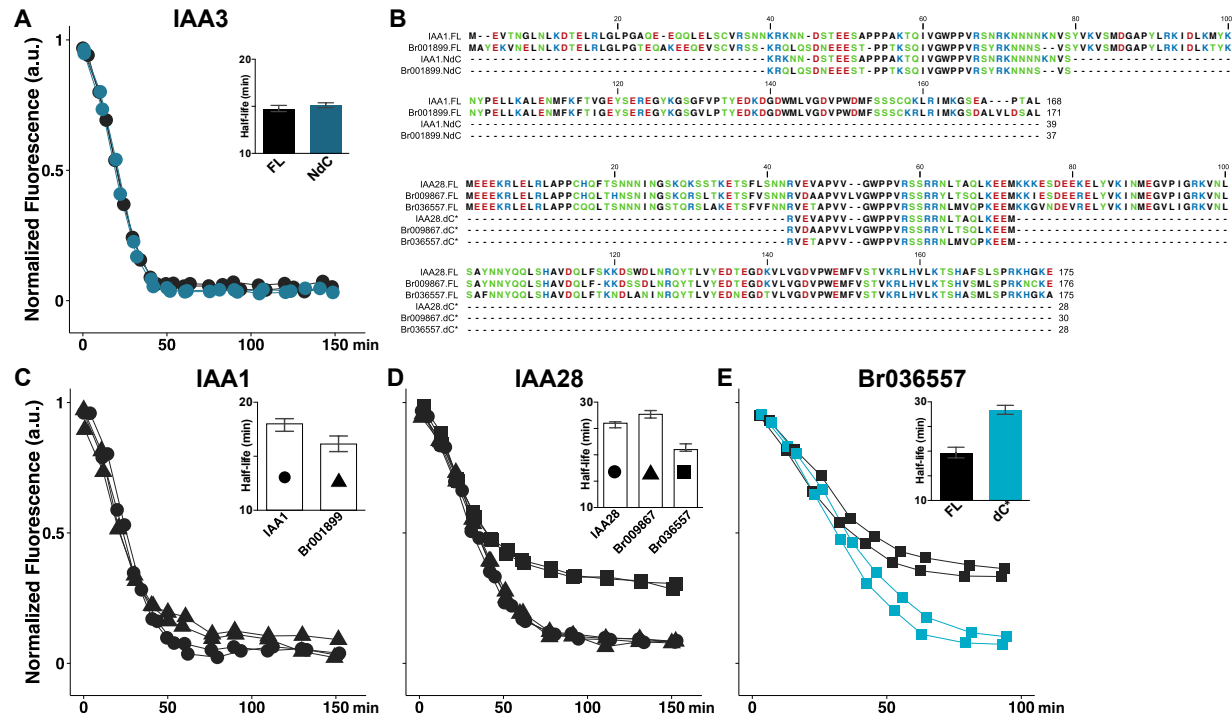

**Supplemental Figure S1: Sequences flanking the degron are required to recapitulate degradation rates of full-length IAA3 and are conserved in *Brassica rapa* orthologs. A)** A short peptide (NdC, blue) of *Arabidopsis thaliana* IAA3 is able to degrade at least as rapidly as the respective full-length (FL) protein (black) as assessed by time-lapse fluorescence flow cytometry. To facilitate comparison of degradation dynamics, mean fluorescence values were normalized to starting fluorescence. All data represent two independent experiments. Half-lives in this and all following panels represent means calculated from non-linear regression fits such as those as shown in Fig. 2B. Error bars represent 95% confidence intervals. **B)** Alignments of full-length, NdC and dC\* fragments of *A. thaliana* IAA1 and IAA28 with their putative *B. rapa* orthologs. **C-D)** Full-length *B. rapa* IAA1 (C) and IAA28 (D) orthologs exhibit similar auxin-induced degradation dynamics as their *A. thaliana* counterparts when co-expressed with *A. thaliana* TIR1 in yeast. **E)** The FL and dC\* fragment of one putative *B. rapa* IAA28 ortholog (Br036557) exhibited different degradation dynamics.

## Supplemental Figure S2

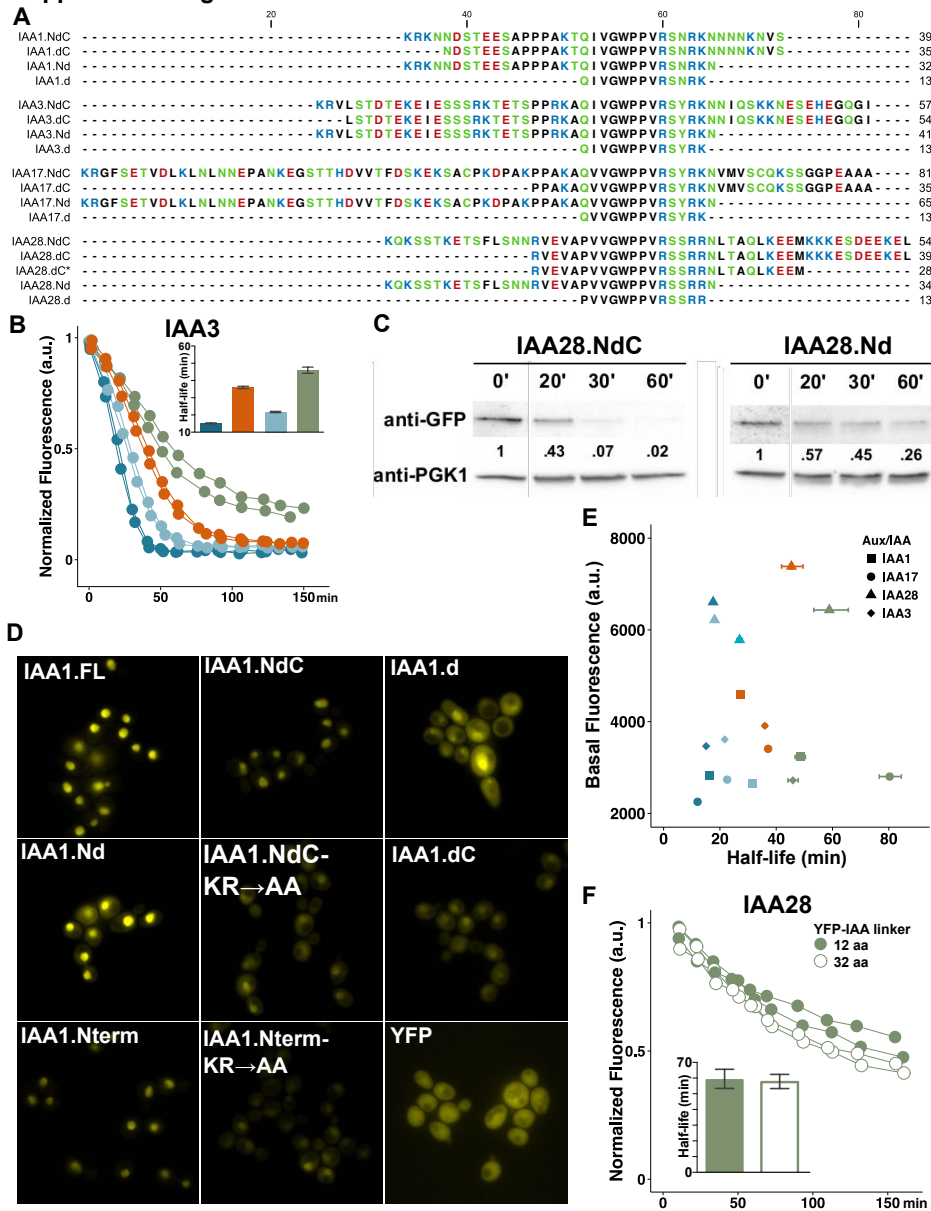

**Supplemental Figure S2: The influence of N- and C-terminal rate motifs on degradation dynamics is IAA-dependent and is not confounded by differences in nuclear localization, basal expression, or linker length. A)** Alignments of NdC, dC, dC\*, Nd, and d fragments of IAA1, IAA3, IAA17, and IAA28. **B)** Regions N- and C-terminal of the degron influence IAA3 degradation dynamics. Colors in this and the following Supplemental Figures is consistent with Aux/IAA truncations indicated in Fig. 2A. Auxin-induced degradation in the presence of TIR1 was captured as before; half-lives in this panel (inset), and all subsequent panels, are presented with 95% confidence intervals. **C)** IAA28.NdC degrades faster than IAA28.Nd in yeast. Western

blot of auxin-induced IAA28.NdC and IAA28.Nd degradation in diploid yeast co-expressing TIR1 and the indicated YFP-IAA28 fragment. Whole cell lysates were prepared at various time points after treating with 10  $\mu$ M auxin. **D)** All YFP-IAA1-2xSV40 fusion proteins localized in the nucleus of diploid yeast cells, though intensity differed between the constructs. **E)** Aux/IAA degradation rate did not correlate with levels of basal expression. Basal fluorescence intensity (e.g. pre-auxin treatment) of each YFP-IAA was plotted against the degradation half-life. These values were determined using nonlinear regression of the fluorescence degradation time courses obtained by flow cytometry (Fig. 2B-D, S2B). Error bars represent 95% confidence intervals. **F)** YFP-degron linker length did not contribute to degradation speed. IAA28.d fragments containing a 12 or 32 amino acids (aa) linker between the YFP moiety and the degron were co-expressed with TIR1 in yeast.

## Supplemental Figure S3

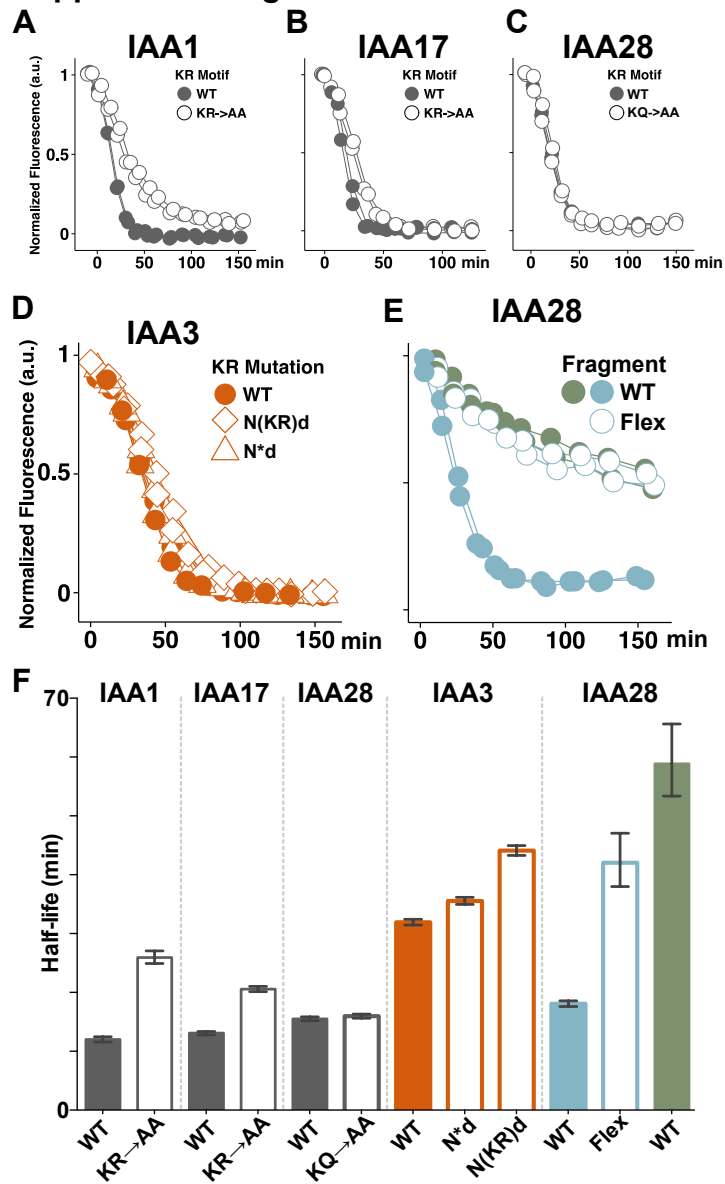

**Supplemental Figure S3: The N-terminal KR residues contribute to Aux/IAA degradation rate, while rate determinants in the C-terminus cannot be replaced with a flexible linker.**

A-C) Mutating the KR rate motif in the context of the Nterm fragment slowed degradation of IAA1 (A) and IAA17 (B), but not IAA28 (C). D) Altering the KR-to-degron distance in IAA3 had no effect or slightly slowed IAA3.Nd degradation. E) Replacing the C-terminal rate motif of IAA28.dC with a flexible linker of identical length (4xGGSGG linker, IAA28.dC-Flex) resulted in slower degradation dynamics than observed for the wild-type IAA28.dC fragment. F) Half-lives with 95% confidence intervals for data in A-E.

## Supplemental Figure S4

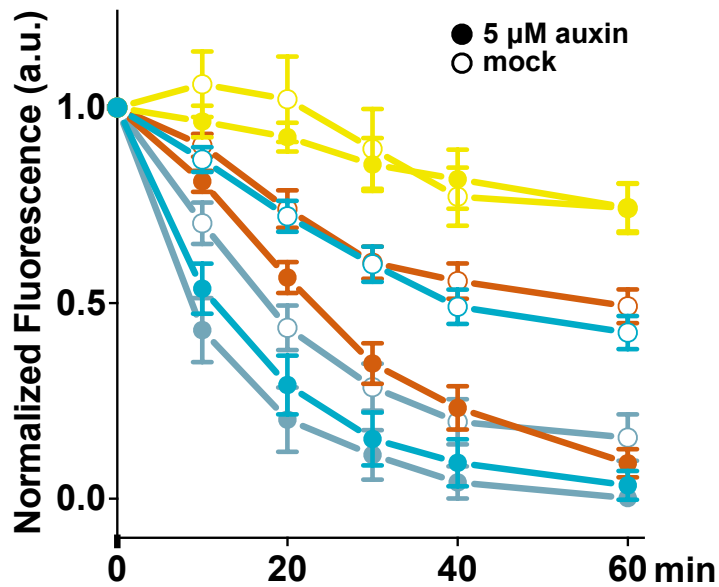

## Supplemental Figure S4: Degradation of VENUS-IAA28 fragments in plant roots.

Auxin-induced VENUS-IAA28 degradation in *Arabidopsis* root tips. Data shown represent root tips treated with 5 μM exogenous auxin (closed symbols) or mock (95% ethanol, open symbols) and are normalized as shown in Fig. 4B. The IAA28 fragments are consistent with those described in Fig. 2A: light blue for IAA28.dC, bright blue for IAA28.dC\*, orange for IAA28.Nd; yellow represents VENUS-alone.

## Supplemental Figure S5

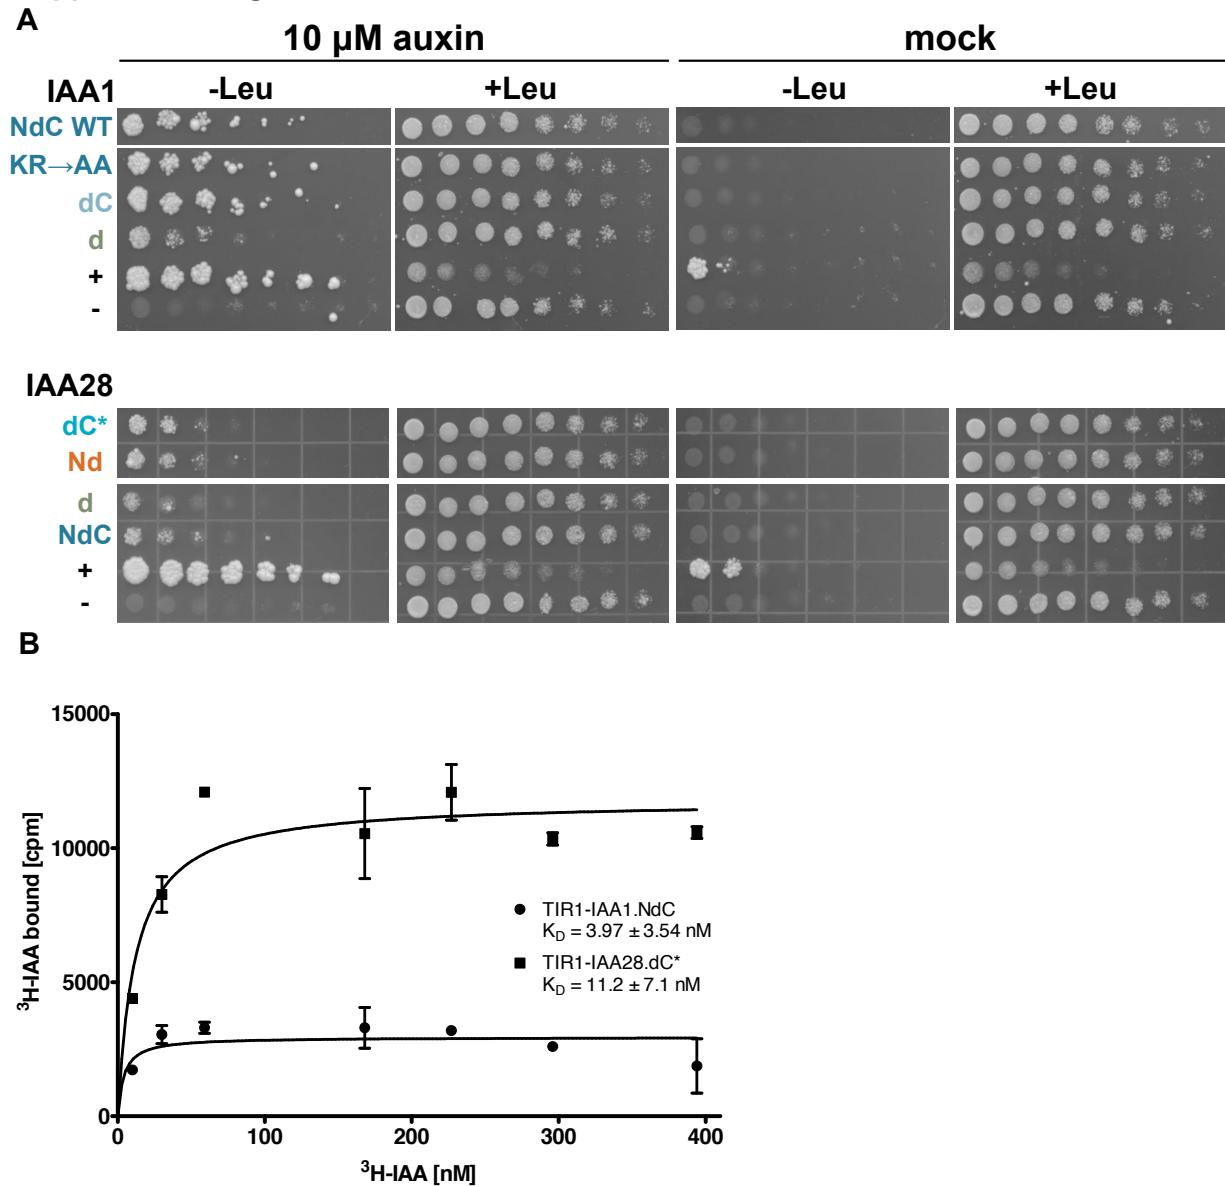

**Supplemental Figure S5: Binding affinity between IAA28 and IAA1 fragments and the TIR1 auxin receptor is not always correlated with degradation rate.** **A)** Interaction between TIR1 and several IAA1 and IAA28 peptides was assessed by yeast two hybrid assay in the presence of 10  $\mu$ M auxin or mock (95% ethanol). Media lacking leucine selects for interaction, while media supplemented with leucine serves as a growth control. Technique control strains were yeast co-expressing full-length IAA7 (+) or empty vector (-) and TIR1. **B)** Radiolabeled auxin binding of TIR1 in complex with IAA1.NdC or IAA28.dC\*.

**SUPPLEMENTAL PROTOCOL S1: MATERIALS & METHODS****Saturation Auxin Binding Assays**

Radioligand binding assays were performed as previously described in Calderón Villalobos *et al.* (2012). In brief, binding assays were carried out using highly pure recombinant TIR1-ASK1 protein complex and N-terminal GST-tagged AUX/IAA protein truncations. Duplicate samples containing proteins, radiolabeled indole-3-acetic acid (IAA) and cold competitor (unlabeled IAA) were incubated for one hour on ice, subsequently filter-immobilized, and washed with binding buffer. Filters were incubated overnight in scintillation buffer and retained radiolabeled auxin was measured via scintillation counting. Nonspecific binding was determined using a 10,000-fold excess of cold IAA with respect to [<sup>3</sup>H]-IAA. Data analysis was performed using GraphPad Prism 5 software.  $K_D$  values were obtained applying one site binding (hyperbola) model. Specific binding was calculated as the difference of average total binding and nonspecific binding. Samples for total and non-specific binding were in duplicates.
